# Supplementary material for: The anti‐hypertensive drug prazosin inhibits glioblastoma growth via the PKCδ‐dependent inhibition of the AKT pathway
Source: PubMed Central journal article supplement (PMC5130115; doi:10.15252/emmm.201505421), 2016-04-04

Caspase 3 blots related to Fig 4A

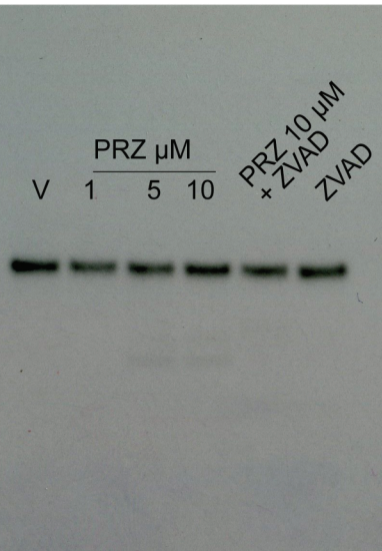

ERK and P-ERK blots related to Fig 4H

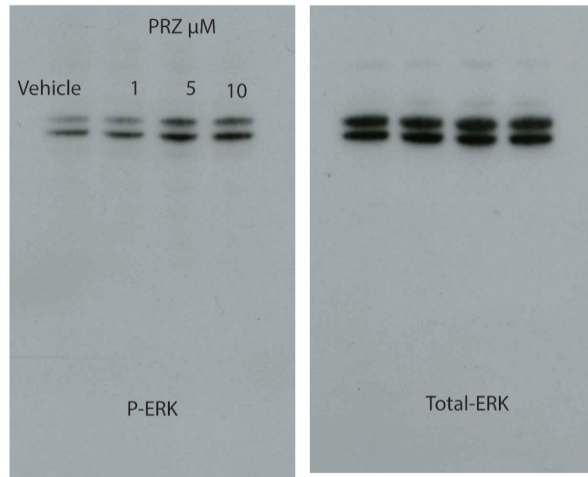

Supplement: EMMM-8-511-s003.pdf [file EMMM-8-511-s003.pdf]
