# Supplementary material for: The anti‐hypertensive drug prazosin inhibits glioblastoma growth via the PKCδ‐dependent inhibition of the AKT pathway
Source: PubMed Central journal article supplement (PMC5130115; doi:10.15252/emmm.201505421), 2016-04-04

beta-catenin blots related to Fig 5J

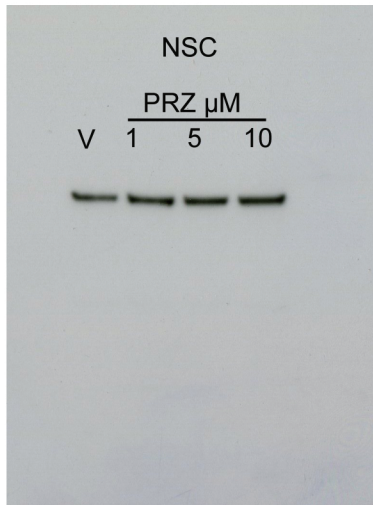

AKT blots related to Fig 5L

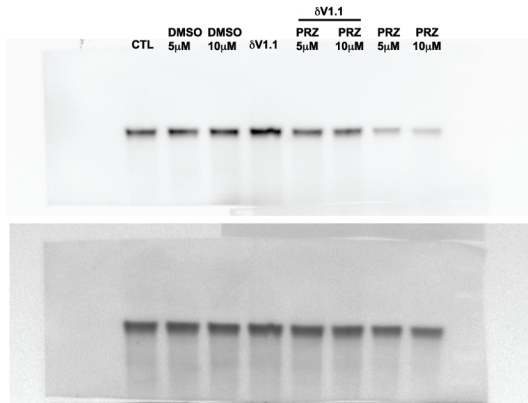

Supplement: EMMM-8-511-s004.pdf [file EMMM-8-511-s004.pdf]
